# Supplementary material for: Loss of MYBBP1A Induces Cancer Stem Cell Activity in Renal Cancer
Source: PubMed Central journal article supplement (PMC6406377; doi:10.3390/cancers11020235), 2019-02-18
Supplement: cancers-11-00235-s001.pdf [file cancers-11-00235-s001.pdf]

# Supplementary Materials: Loss of MYBBP1A Induces Cancer Stem Cell Activity in Renal Cancer

Blanca Felipe-Abrio, Eva Maria Verdugo-Sivianes, Carmen Sáez and Amancio Carnero

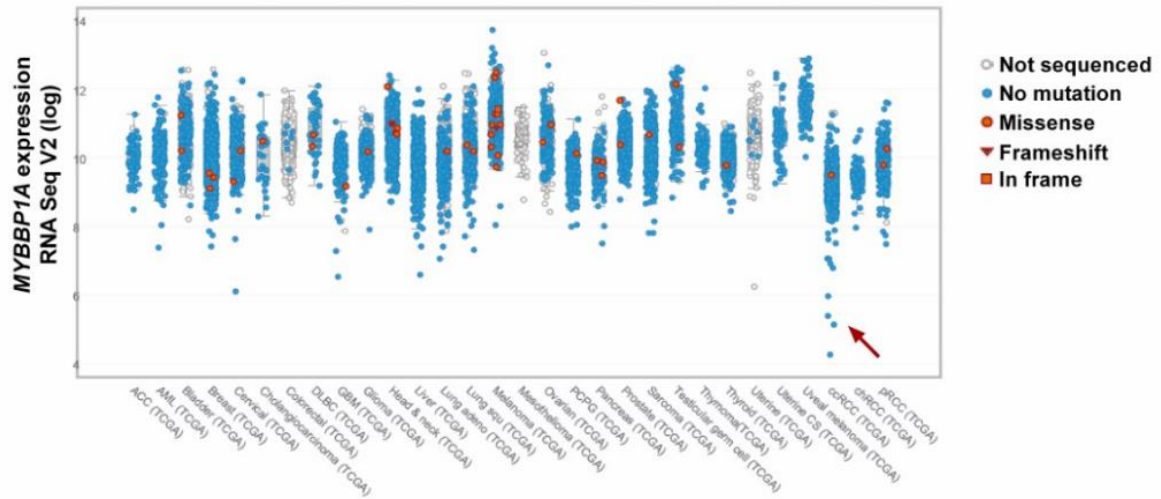

**Figure S1.** *MYBBP1A* expression in human tumors. Data from cBioPortal for Cancer Genomics. Arrow points ccRCC tumors with the lowest levels of *MYBBP1A* expression.

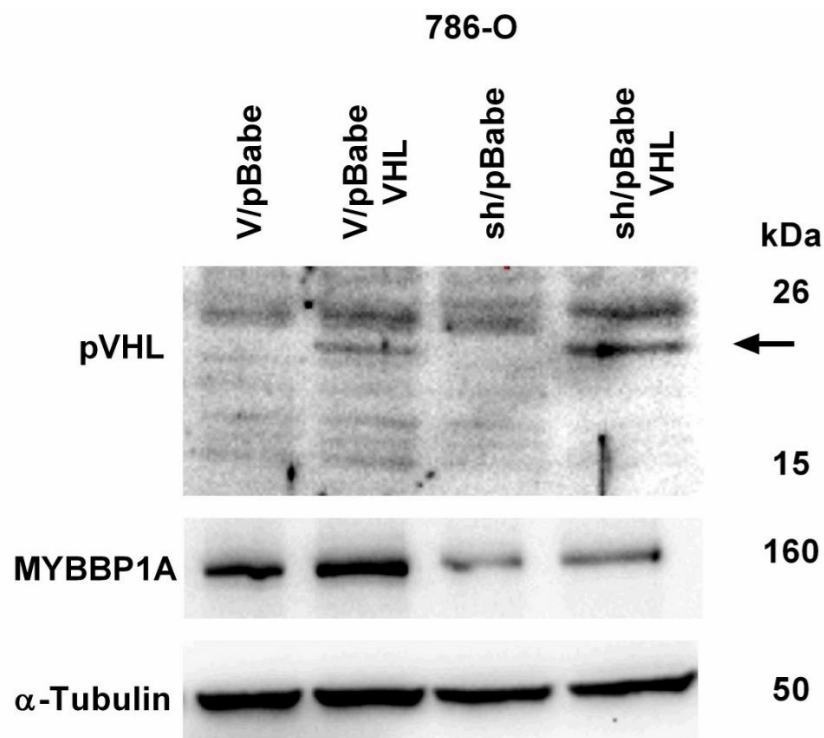

**Figure S2.** *VHL* overexpression does not affect *MYBBP1A* levels in 786-O cell line. We overexpressed *VHL* gene in 786-O cells transfected either with scramble vector or sh*MYBBP1A* and we measured pVHL and *MYBBP1A* levels by western blot.

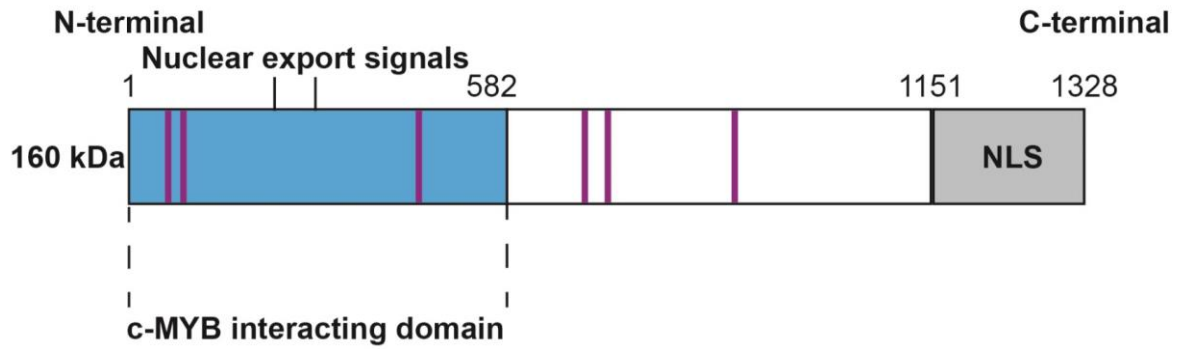

**Figure S3.** Schematic representation of structural features of MYBBP1A. The domain reported to interact with c-MYB (aa 1-582) is shown in blue. Nuclear and nucleolar localization signal (NLS) domain is indicated in grey. Putative leucine zipper motifs that are conserved between species [1] are shown in purple.

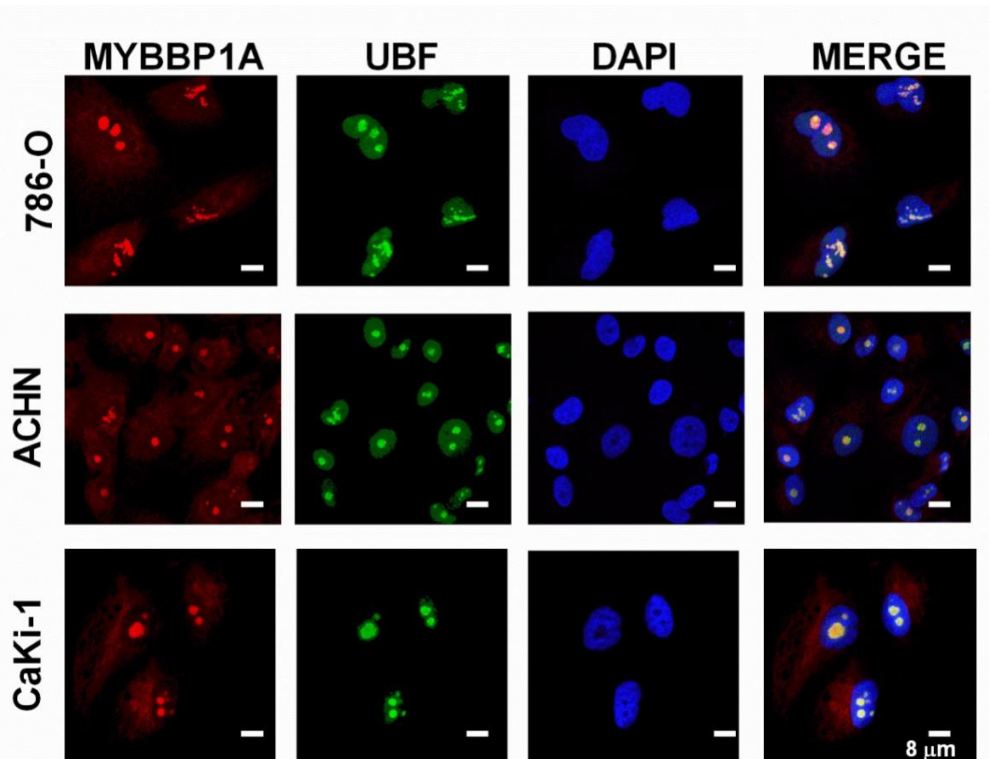

**Figure S4.** MYBBP1A is located in the nucleolus of renal carcinoma cell lines. 786-O, ACHN and CaKi-1 cells were fixed and stained using UBF antibody (nucleolar control), MYBBP1A antibody and DAPI (nuclear control).

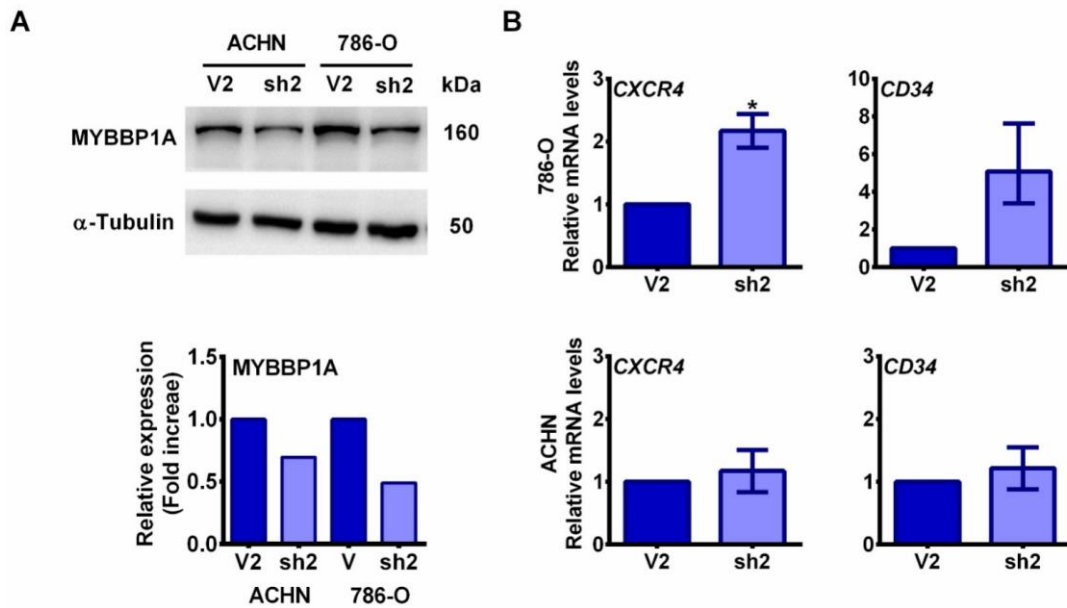

**Figure S5.** Effect of second shRNA against *MYBBP1A* in genes directly transcribed by c-MYB. (A) Validation of *MYBBP1A* knock down. 786-O and ACHN cell lines were transfected with *MYBBP1A* shRNA2 (sh2) and an empty vector (V2). After selection, proteins were extracted when cells reached 80% confluence and *MYBBP1A* levels were measured by WB. (B) Measurement of mRNA levels of genes directly transcribed by c-MYB in 786-O and ACHN cells expressing *MYBBP1A* shRNA2 (sh2) or the empty vector (V2) by Q-RT-PCR.

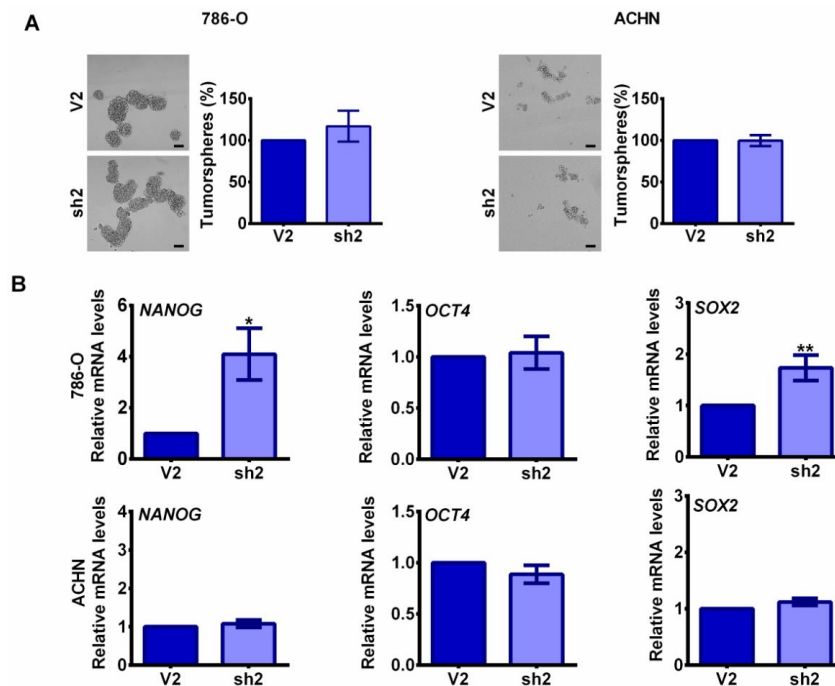

**Figure S6.** Effect of second shRNA against *MYBBP1A* in CSC phenotype. (A) Tumorsphere formation assay of 786-O and ACHN cells expressing *MYBBP1A* shRNA2 (sh2) and the empty vector (V2). Scale bars: 200  $\mu$ m. (B) Measurement of mRNA levels of stem genes (*NANOG*, *OCT* and *SOX2*) by Q-RT-PCR in 786-O and ACHN cells expressing *MYBBP1A* shRNA2 (sh2) and the empty vector (V2).

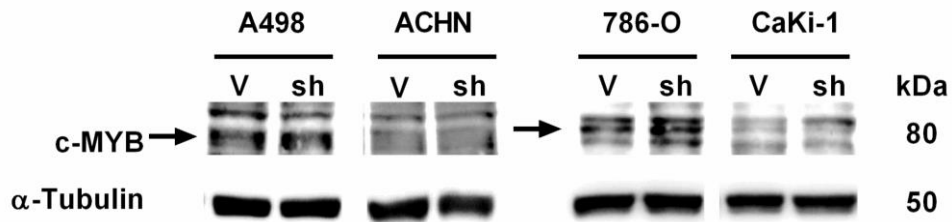

**Figure S7.** Effect of MYBBP1A knock down in c-MYB levels. Proteins from control and MYBBP1A knock down cells were extracted and c-MYB levels were measured by western blot.

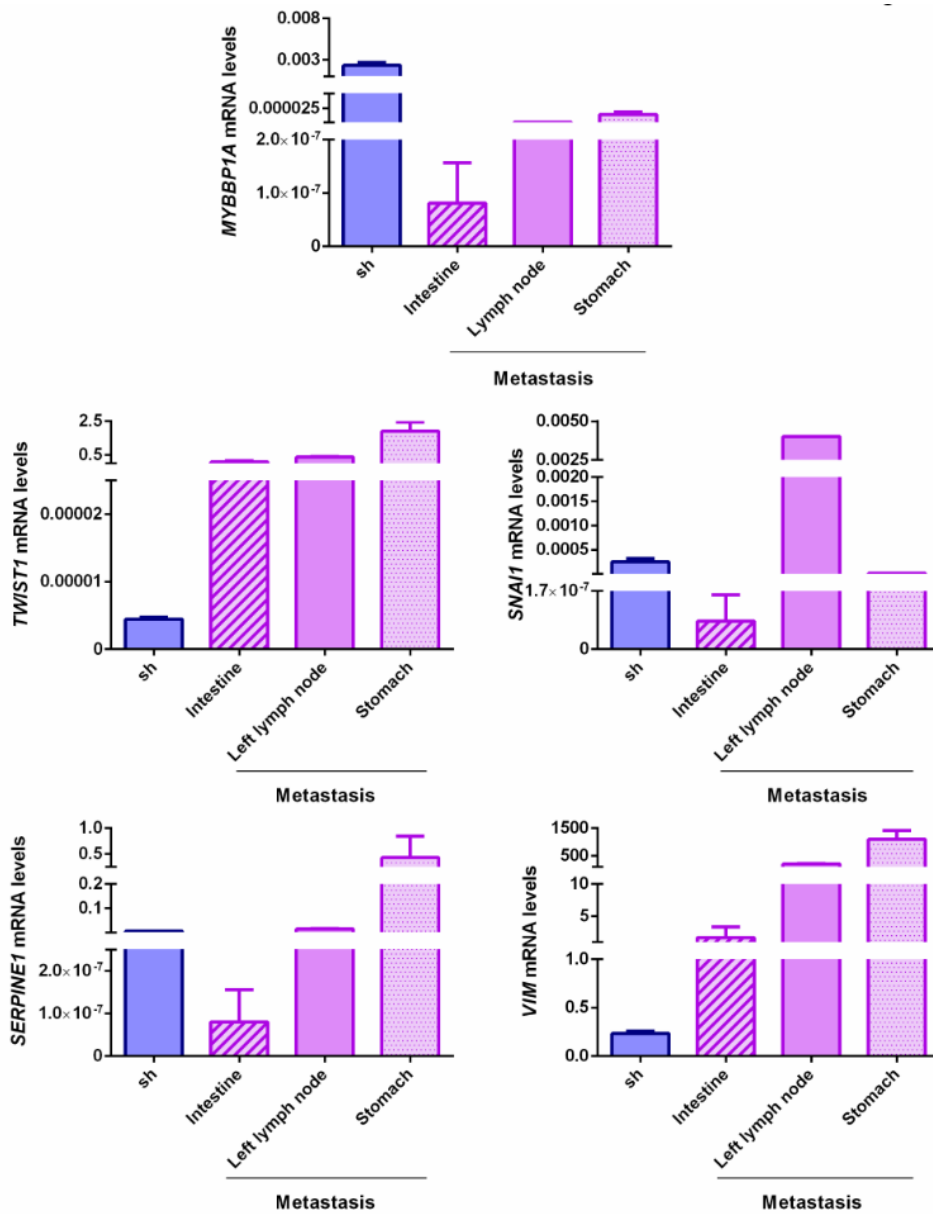

**Figure S8.** Expression of *MYBBP1A* and EMT-related genes in primary tumors and metastasis. Measurement of mRNA levels of *MYBBP1A*, *TWIST1*, *SNAI1*, *SERPINE1* and *VIM* in primary tumors and metastasis from A498 MYBBP1A knock down cells by Q-RT-PCR.

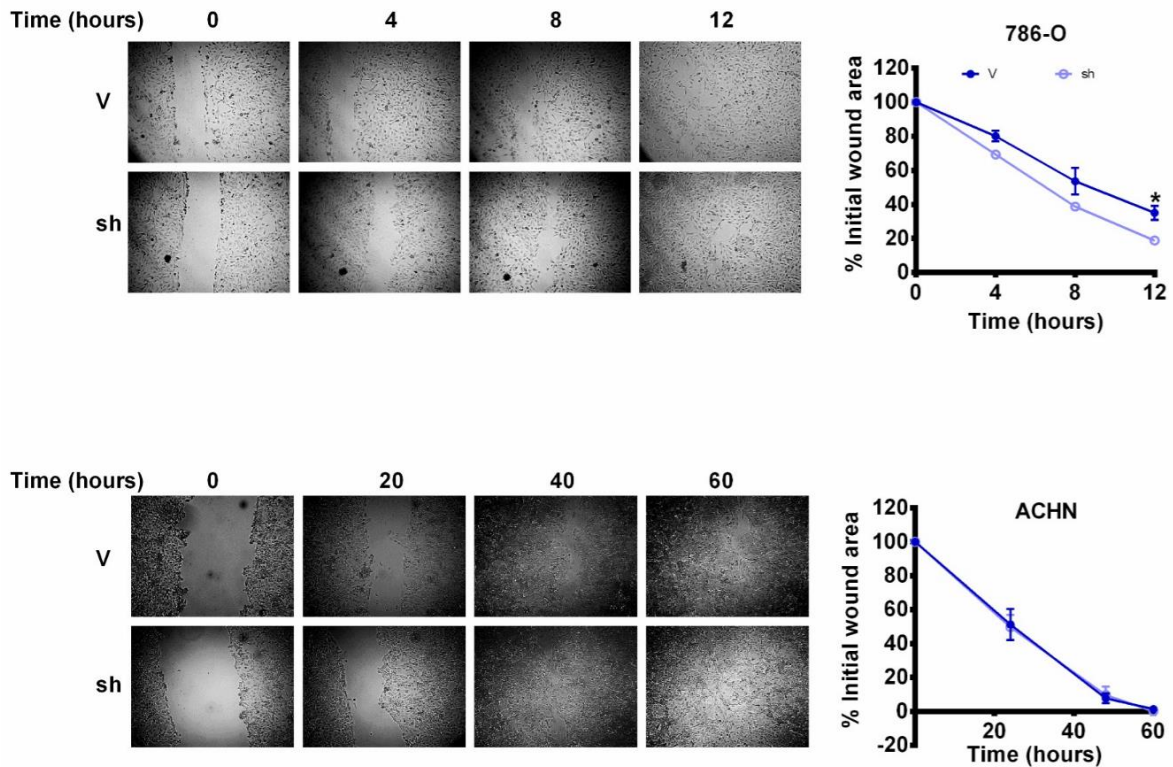

**Figure S9.** MYBBP1A knock down increases migration in c-MYB<sup>+</sup> cells. Cell migration was measured by wound-healing assay. Graphs show the mean  $\pm$ SD of 3 independent experiments performed in triplicate. \*  $p < 0.05$ .

**Table S1.** Patient clinical characteristics of the cohort used in our study. Related to figure 6.

| Population characteristics      | Number of cases | Percentage (%) |
|---------------------------------|-----------------|----------------|
| Normal samples                  | 5               | 5.21           |
| Type of renal cell cancer (RCC) |                 |                |
| Clear cell (ccRCC)              | 65              | 67.71          |
| Papillary cell (pRCC)           | 19              | 19.79          |
| Chromophobe (chRCC)             | 2               | 2.08           |
| Mixed RCC                       | 3               | 3.13           |
| Sarcomatoid clear cell RCC      | 5               | 5.21           |
| Sarcomatoid chromophobe RCC     | 1               | 1.04           |
| Unclassifiable                  | 1               | 1.04           |
| TNM staging                     |                 |                |
| I                               | 41              | 42.71          |
| II                              | 10              | 10.42          |
| III                             | 23              | 23.96          |
| IV                              | 10              | 10.42          |
| Undetermined                    | 12              | 12.5           |
| Treatment approach              |                 |                |
| Surgery                         | 96              | 100            |
| Radiotherapy                    | 10              | 10.42          |
| Chemotherapy                    | 48              | 50             |
| Tk inhibitors                   | 64              | 66.67          |
| mTOR inhibitors                 | 24              | 25             |
| Interleukin 2                   | 1               | 1.04           |
| Capacitabine                    | 1               | 1.04           |
| Palliative                      | 5               | 5.21           |

**Table S2.** Percentage of cases of each renal cell carcinoma subtype in low MYBBP1A and normal MYBBP1A groups. Related to figure 6.

| Type of renal cell cancer (RCC) | Total percentage |                | Relative percentage by group |                |
|---------------------------------|------------------|----------------|------------------------------|----------------|
|                                 | Low MYBBP1A      | Normal MYBBP1A | Low MYBBP1A                  | Normal MYBBP1A |
| Clear cell (ccRCC)              | 8.33             | 59.38          | 88.89                        | 65.51          |
| Papillary cell (pRCC)           |                  | 19.79          |                              | 21.64          |
| Chromophobe (chRCC)             |                  | 2.08           |                              | 2.30           |
| Mixed RCC                       |                  | 3.13           |                              | 3.45           |
| Sarcomatoid clear cell RCC      | 1.04             | 4.17           |                              | 4.60           |
| Sarcomatoid chromophobe RCC     |                  | 1.04           |                              | 1.15           |
| Unclassifiable                  |                  | 1.04           | 11.11                        | 1.15           |

## Reference

1. Keough, R.; Woollatt, E.; Crawford, J.; Sutherland, G.R.; Plummer, S.; Casey, G.; Gonda, T.J. Molecular cloning and chromosomal mapping of the human homologue of MYB binding protein (P160) 1A (MYBBP1A) to 17p13.3. *Genomics* **1999**, *62*, 483–489, doi:10.1006/geno.1999.6035.

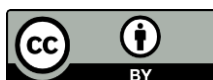

© 2019 by the authors. Licensee MDPI, Basel, Switzerland. This article is an open access article distributed under the terms and conditions of the Creative Commons Attribution (CC BY) license (<http://creativecommons.org/licenses/by/4.0/>).
